# Supplementary material
Source: HighWire-hosted journal article supplement (https://bjsm.bmj.com/content/52/4/238)

**A**
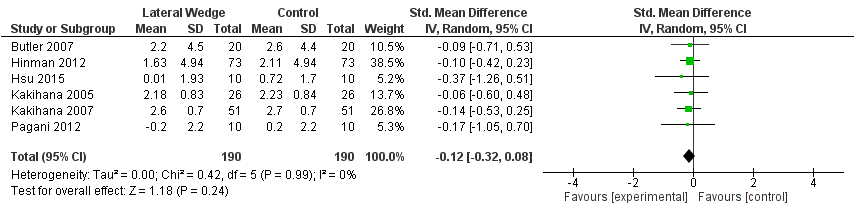


**B**
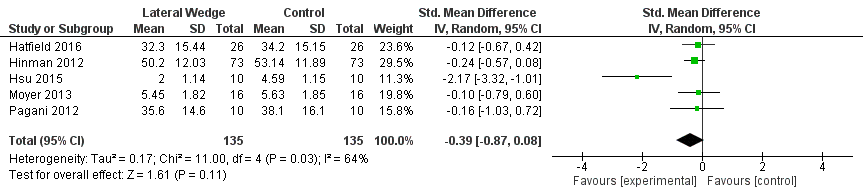


**C**
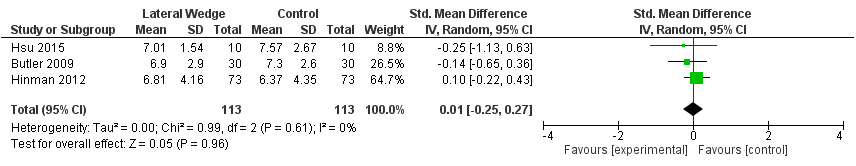


**D**
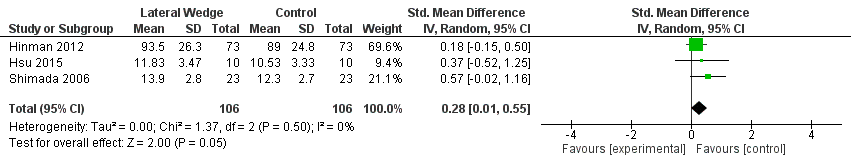


**E**
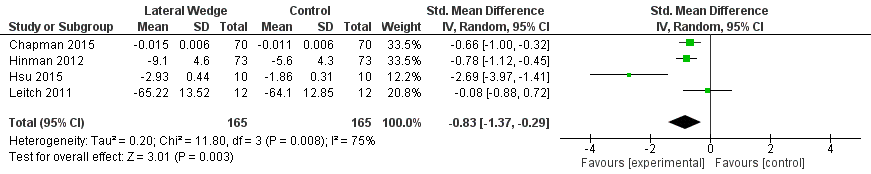


**Appendix 2**

Supplement: inline-supplementary-material-2 [file inline-supplementary-material-2.docx]
